# Supplementary material for: A Meta-Analysis of fMRI Studies of Youth Cannabis Use: Alterations in Executive Control, Social Cognition/Emotion Processing, and Reward Processing in Cannabis Using Youth
Source: MDPI journal article supplement (doi:10.3390/brainsci12101281), 2022-09-23
Supplement: s1 [file s1]

## Supplementary Online Content

Hammond CJ\*, Allick A\*, Park G, Rizwan B, Kim K, Lebo R, Nanavati J, Parvaz M, Ivanov I.  
A Meta-analysis of fMRI Studies of Youth Cannabis Use: Alterations in Executive Control,  
Social Cognition/Emotion Processing and Reward Processing in Cannabis Using Youth. *Brain  
Science*, 2022

**Methods S1.** Additional methodologic details related to task/paradigm domains and meta-analytic procedure

**Table S1.** Cognitive Domains & Subdomains of Studies used in fMRI meta-analysis

**Table S2.** Age, Sex, and Cannabis-related Variables in CU youth for use in Meta-analyses and Meta-regression analyses

**Table S3.** Controlling for covariates/confounders across studies included in the Meta-analysis

**Table S4.** Proportion of CU Youth with Psychiatric Diagnoses of CUD, AUD, Tobacco Smoking, Depressive disorders, Anxiety disorders, ADHD, and CD/ASPD

**Results S1.** Qualitative Analysis of fMRI Studies of Brain Activity Differences Between CU vs. TD Youth

**Figure S1.** Meta-regression Results showing an association between BOLD response differences between CU and TD youth and proportion of female participants

**Table S5.** Results of Jack-knife Reliability Analyses for Executive Function/Cognitive Control Meta-analysis

**Table S6.** Results of Jack-knife Reliability Analysis for Social Cognition/Emotion Processing Meta-analysis

**Figure S2.** Funnel Plots for Primary Meta-analysis for Executive Function/Cognitive Control and Social Cognition Emotion Processing Domains

**Table S7.** Abstinence-focused Subgroup Meta-analysis of fMRI studies comparing CU and TD youth

**Figure S3.** Meta-analysis Results showing BOLD response differences in CU compared to TD youth for different abstinence subgroups

**Figure S4.** Meta-analysis Results showing BOLD response differences in adolescents with CUD compared to TD adolescents

---

**Methods S1.** Additional methodologic details related to the meta-analytic procedure

Cognitive Domains and Subdomains of Tasks/Paradigms for Subgroup Meta-analysis: We divided studies/experiments into 11 categories based upon common cognitive/affective domains: attention/concentration (ATTN), auditory processing (AUDITORY), decision making (DM), drug cue exposure (DRUG CUE), executive function/cognitive control (EF/CC), interoceptive processes (INT), associative drug memory (MEM), reward processing (REW), self-referential processing (SELF), social cognition/emotion processing (SC/EM), and visuospatial/perceptual-motor (VS/PM). The EF/CC tasks were designed to examine a range of effortful, attention demanding higher order executive

functions including working memory (9 studies/experiments), conflict monitoring (2 studies/experiments), response inhibition (4 studies/experiments), and verbal learning/memory (1 experiment). All of the decision-making tasks measured decision making under risky conditions (5 studies/experiments) and used either gambling paradigms or choice paradigms in the setting of variable risk of monetary loss or gain. The SC/EM tasks all measured brain activation during presentation of social stimuli or emotionally salient stimuli. The social cognition tasks included assessments of decision making, choice behaviors, and BOLD response following social influence and social exclusion. The emotion tasks included emotional perception of facial emotions and affective pictures, cognitive reappraisal of negative emotional stimuli, emotional perception of looming and receding threats, and a task assessing emotional and BOLD response during a Stroop interference task with affective content (affective Stroop task). The REW tasks measured brain activity during different phases of reward processing including reward anticipation and reward receipt/feedback, and in relation to individual differences in the propensity for engaging in reward-related “approach” behaviors using simple win/loss feedback, monetary incentive delay (MID), approach bias, and risky DM tasks.

In our meta-analytic sample of 45 studies: sixteen, five, nine, eight, and six studies were categorized into EF/CC, DM, SC/EM, REW, and DRUG CUE domains respectively. No other domain had more than four studies/experiments. Based upon the number of studies in each category, our primary analyses focused on EF/CC, SC/EM, and REW domains. Focusing on studies for which there were five or more studies/experiments for meta-analytic comparison, supplemental subgroup meta-analyses for DM (5 studies) and DRUG CUE (6 studies) domains and working memory (8 studies), emotion processing (5 studies), and reward feedback (6 studies) subdomains were conducted. Subdomains for which there were too few studies/experiments for an appropriately powered subgroup meta-analysis (e.g., INT with 3 studies), were qualitatively analyzed (see Table S2 and Results S1 below).

Linear meta-regression analyses: Simple linear meta-regression analyses were carried out weighted by the square root of the sample size to predict SDM effect size values. The main output for each variable indicates the regression slope (i.e. amount of BOLD signal change per unit increase in mean age, proportion of females, duration of CU [mean years]), proportion of CUD diagnoses, and mean CUDIT scores. Significant clusters from the individual meta-regression analyses can be interpreted as regions showing BOLD signal differences between CU and TD youth that varied as a function of that variable (e.g., proportion of females) in the datasets/studies.

**Table S1.** Cognitive Domains & Subdomains of Studies used in fMRI meta-analysis

| Domain                                         | Subdomain                                | Studies                                                                                                                                                                                                                                                                | Results                                                                                                                                                                                                                                                                                                                       |
|------------------------------------------------|------------------------------------------|------------------------------------------------------------------------------------------------------------------------------------------------------------------------------------------------------------------------------------------------------------------------|-------------------------------------------------------------------------------------------------------------------------------------------------------------------------------------------------------------------------------------------------------------------------------------------------------------------------------|
| Executive Function & Cognitive Control (EF/CC) | Working Memory (WM)                      | Padula et al., 2007<br>Schweinsburg et al. 2005<br><br>Schweinsburg et al. 2008<br><br>Schweinsburg et al. 2010 (SWM)<br>Smith et al. 2010<br>Jager et al., 2010<br>Jacobsen et al., 2007<br>Kroon et al., 2021 (N-back w/ drug cue)<br><br>Tervo-Clemmens et al. 2018 | Positive (CU>TD)<br>Positive (CU>TD in mPFC and CU<TD in IFG and temporal regions)<br>Positive (CU>TD in parietal cortex and CU<TD in mPFC)<br>Positive (CU > TD)<br>Positive (CU>TD)<br>Negative<br>Positive (CU >TD)<br>Positive (WM effect [2-back vs 1-back] and Flanker-by-WM-effect) (CU<TD)<br>Positive (CU < TD)      |
|                                                | Verbal Learning/Memory                   | Schweinsburg et al. 2011 (VPAT)                                                                                                                                                                                                                                        | Positive (CU > TD)                                                                                                                                                                                                                                                                                                            |
|                                                | Response Inhibition (RI)                 | Tapert et al., 2007 (Go/No-Go)<br>Behan et al., 2014 (Go/No-Go)<br>Thayer et al., 2015 (Stroop)<br>Hatchard et al., 2014 (Stroop)                                                                                                                                      | Positive (CU > TD)<br>Negative<br>Negative<br>Positive (CU>TD)                                                                                                                                                                                                                                                                |
|                                                | Conflict Monitoring (CM)                 | Abdullaev et al. 2010 (ANT)<br>Cyr et al., 2019                                                                                                                                                                                                                        | Positive (CU>TD)<br>Positive (CU<TD)                                                                                                                                                                                                                                                                                          |
|                                                |                                          |                                                                                                                                                                                                                                                                        |                                                                                                                                                                                                                                                                                                                               |
| Decision Making (DM)                           | Decision Making Under Risk               | DeBellis et al., 2013 (decision reward uncertainty task)<br>Claus et al., 2018 (BART)<br>Raymond et al., 2020 (BART)<br>Cousijn et al., 2013 (IGT)<br><br>Aloi et al., 2020 (passive avoidance task)                                                                   | Positive (for uncertain vs. known risk)<br><br>Positive<br>Positive<br>Negative (for advantageous vs. disadvantageous DM contrast)<br>Negative                                                                                                                                                                                |
| Social Cognition & Emotion Processing (SC/EM)  | Social Cognition (SC)                    | Gilman et al., 2016a (social influence)<br><br>Gilman et al., 2016b (social exclusion)<br><br>Gilman et al., 2016c (social influence)<br>Blair et al., 2021 (retaliation task)                                                                                         | Positive (CU>TD in mPFC, STG, parietal cortex for social influence vs. no-infl.)<br>Positive (CU<TD in right insula and vmPFC for exclusion vs. fair)<br>Positive (CU>TD)<br>Negative                                                                                                                                         |
|                                                | Emotion Processing (EM)<br>EM Reactivity | Heitzeg et al., 2015 (affective word stimuli)<br><br><br><br>Leiker et al., 2019 (emotional face stimuli)<br>Blair et al., 2019 (looming threat)                                                                                                                       | Positive (CU < TD in dlPFC, MTG, STG, cuneus, insula, amygdala for negative words and CU > TD in dlPFC and CU < TD in IPL and amygdala for positive words)<br><br><br><br>Positive (CU< TD in rmPFC and ACC for emotional faces [happy vs. neutral])<br>Positive (CU<TD for looming vs. receding threat in mPFC and fusiform) |
|                                                | EM Regulation                            | Zimmerman et al., 2017 (cog reappraisal)<br><br><br><br>Aloi et al., 2018 (affective Stroop)                                                                                                                                                                           | Positive for EM regulation (CU>TD in mPFC, cingulate, amygdala during distancing from negative stimuli) but negative for EM reactivity (CU=TD)<br>Positive (CU>TD)                                                                                                                                                            |
|                                                |                                          |                                                                                                                                                                                                                                                                        |                                                                                                                                                                                                                                                                                                                               |
|                                                |                                          |                                                                                                                                                                                                                                                                        |                                                                                                                                                                                                                                                                                                                               |
| Reward Processing (REW)                        | Reward Anticipation                      | Jager et al., 2013 (MID [win vs. neutral])                                                                                                                                                                                                                             | Negative                                                                                                                                                                                                                                                                                                                      |
|                                                | Reward Feedback                          | Jager et al., 2013 (MID [win vs. neutral])<br>Acheson et al., 2015 (win/loss feedback task [win vs. neutral and loss vs. neutral])                                                                                                                                     | Negative<br>Positive (win vs. neutral: CU> TD; loss vs. neutral: CU>TD)                                                                                                                                                                                                                                                       |

|                                         |                                                                                                                 |                                                                                                                                                                                                                                                                                                                                                                                                 |                                                                                                                                                                                                                                                                                                                                                                                                                                                                                       |
|-----------------------------------------|-----------------------------------------------------------------------------------------------------------------|-------------------------------------------------------------------------------------------------------------------------------------------------------------------------------------------------------------------------------------------------------------------------------------------------------------------------------------------------------------------------------------------------|---------------------------------------------------------------------------------------------------------------------------------------------------------------------------------------------------------------------------------------------------------------------------------------------------------------------------------------------------------------------------------------------------------------------------------------------------------------------------------------|
|                                         |                                                                                                                 | <p>Aloi et al., 2020 (passive avoidance task [reward vs. punishment feedback])</p> <p>DeBellis et al. 2013 (RF during risk-DM [reward vs. no-reward])</p> <p>Cousijn et al., 2013 (RF during risk-DM [win vs. loss])</p> <p>Aloi et al., 2019 (MID task [win vs. loss])</p>                                                                                                                     | <p>Negative (no main or intxn effects of CUDIT during win vs. loss feedback)</p> <p>Positive (win vs. neutral: CU &gt; TD)</p> <p>Positive (win vs. loss: CU &gt; TD)</p> <p>Positive (CUDIT-by-Accuracy Effect across conditions and CUDIT-by-Reinforcement Cue-by-Accuracy Effect specific to loss feedback/inaccurate trials) [i.e., loss feedback: CU&lt;TD as a function of trial accuracy]; Negative for main effect of CUDIT on BOLD during win feedback, accurate trials.</p> |
|                                         | Reward-related “Approach” Bias                                                                                  | <p>Aloi et al., 2021b (novelty task)</p> <p>Cousijn et al., 2012 (approach bias SRC w/ drug stimuli [cannabis vs. neutral])</p>                                                                                                                                                                                                                                                                 | <p>Positive (CU&lt;TD as a function of higher novelty propensity during explore trials)</p> <p>Negative</p>                                                                                                                                                                                                                                                                                                                                                                           |
| Associative Memory (MEM)                | Implicit Drug Associations                                                                                      | Ames et al., 2013 (MJ implicit assn task)                                                                                                                                                                                                                                                                                                                                                       | Positive                                                                                                                                                                                                                                                                                                                                                                                                                                                                              |
| Attention (ATTN)                        | Alerting & Orienting                                                                                            | Abdullaev et al., 2010 (ANT)                                                                                                                                                                                                                                                                                                                                                                    | Negative for both Alerting & Orienting Contrasts                                                                                                                                                                                                                                                                                                                                                                                                                                      |
| Visuospatial & Perceptual Motor (VS/PM) | Motor                                                                                                           | Lopez-Larson et al., 2012 (motor task)                                                                                                                                                                                                                                                                                                                                                          | Positive                                                                                                                                                                                                                                                                                                                                                                                                                                                                              |
| Auditory Perception (AUDITORY)          | Passive Music Listening                                                                                         | <p>Ford et al., 2014 [MJ-only]</p> <p>Ford et al., 2013 [MJ+MDD]</p>                                                                                                                                                                                                                                                                                                                            | <p>Negative</p> <p>Positive</p>                                                                                                                                                                                                                                                                                                                                                                                                                                                       |
| Interoceptive Processes (INT)           |                                                                                                                 | <p>Migliorini et al., 2013 (soft touch task)</p> <p>Berk et al., 2015 (aversive inspiratory breathing load task)</p> <p>May et al., 2020 (aversive inspiratory breathing load task w/ drug cue)</p>                                                                                                                                                                                             | <p>Positive</p> <p>Positive</p> <p>Positive (for interoceptive contrast)</p>                                                                                                                                                                                                                                                                                                                                                                                                          |
| Self-Referential Processes (SELF)       |                                                                                                                 | Aloi et al., 2021 (comparative optimism)                                                                                                                                                                                                                                                                                                                                                        | Positive                                                                                                                                                                                                                                                                                                                                                                                                                                                                              |
| Drug Cue Exposure                       | <p>Visual Drug Cue Reactivity</p> <p>Drug cue exposure during a complex cognitive task (INT, WM, REW tasks)</p> | <p>Cousijn et al., 2012a (visual cue)</p> <p>Zhou et al., 2019 [DEP-MJ] (visual cue)</p> <p>Zhou et al., 2019 [ND-MJ] (visual cue)</p> <p>May et al., 2020 (aversive inspiratory breathing load task w/ visual drug cue)</p> <p>Kroon et al., 2021 (N-back task with cannabis + neutral flanker images)</p> <p>Cousijn et al. 2012b (approach bias SRC task with cannabis + neutral images)</p> | <p>Negative</p> <p>Positive</p> <p>Positive</p> <p>Negative (for drug cue contrast administered as part of INT task)</p> <p>Positive for Flanker-by-WM-effect [CU&lt;TD during cannabis images] but negative for cannabis vs. neutral flanker effect [CU=TD]</p> <p>Negative [CU=TD], but in CU group - BOLD response was correlated with lifetime CU and ΔCUDIT</p>                                                                                                                  |

**Notes:** Domains: AUDITORY = Auditory Perception; DM = Decision Making (DM); EF/CC = Executive Function/Cognitive Control; L/MEM = Learning & Memory; LAN = Language; ATTN = Complex Attention/Concentration; VS/PM = Visuospatial/Perceptual-motor; SC/EM = Social Cognition/Emotion; REW = Reward; INT = Interoceptive Stimulus Response; Sensory Stimulus Response. Subdomains: DMUR = Decision Making Under Risk; WM = working memory; SOC = Social Cognition; EM = Emotion Processing; EM-Reactivity = Emotion reactivity; EM-regulation = Emotion regulation; RI = Response Inhibition; RS = Response Selection (e.g. choice RT task); CM = Conflict Monitoring; Risky DM = Risk Decision Making; REW-F = Reward Feedback/Receipt; REW-A = Reward Anticipation; DRUG-CUE = Drug Cue-reactivity; MOTOR = motor (e.g. finger tapping task); INT = interoceptive processing; SELF = self-referential processing

**Table S2.** Age, Sex, and Cannabis-related Variables in CU youth for use in Subgroup Meta-analyses and Meta-regression analyses

| Studies                                                   | Mean Age CU youth (years) | Proportion of Female participants in CU youth | Proportion of CUD diagnosis in CU youth | Mean CUDIT score for CU youth | Duration of CU (years) | Current CU Frequency <sup>A</sup> (days/episodes per month, avg. past 3 mo.) | Lifetime CU <sup>A</sup> (estimated days/episodes) | Abstinence at MRI scan session                                 | Mean days since last use for CU youth |
|-----------------------------------------------------------|---------------------------|-----------------------------------------------|-----------------------------------------|-------------------------------|------------------------|------------------------------------------------------------------------------|----------------------------------------------------|----------------------------------------------------------------|---------------------------------------|
| Padula et al.                                             | 18.1                      | 0.18                                          |                                         |                               |                        |                                                                              | 477.1                                              | ≥ 28 days                                                      |                                       |
| Schweinsburg et al. 2005                                  | 16.9                      | 0.33                                          | 1                                       |                               | 3.37                   | 12.8                                                                         | 309.9                                              | ≥ 48 hours                                                     |                                       |
| Schweinsburg et al. 2008                                  | 18.1                      | 0.27                                          |                                         |                               | 4                      | 13.5                                                                         | 480.7                                              | ≥ 28 days                                                      | 60.4                                  |
| Schweinsburg et al. 2011 (verbal paired association test) | 18                        | 0.25                                          | 0.66                                    |                               | 3.2                    | 11                                                                           | 497.8                                              | ≥ 21 days                                                      |                                       |
| Schweinsburg et al. 2010 (SWM task)                       | 17.33                     | 0.31                                          |                                         |                               | 2.5                    | 15.5                                                                         | 428.8                                              | Recent Users (RU): ≥ 24 hours; Abstinent Users (AU): ≥ 27 days | RU: 3.3 days; AU: 38.1 days           |
| Smith et al.                                              | 20                        | 0.4                                           |                                         |                               | 4.55                   |                                                                              |                                                    | Ad-lib use                                                     |                                       |
| Tapert et al.                                             | 18.1                      | 0.25                                          |                                         |                               | 4.1                    | 12                                                                           | 475.6                                              | ≥ 28 days                                                      | 58.4                                  |
| Berk et al.                                               | 16.6                      | 0.33                                          | 0.73                                    |                               |                        |                                                                              | 351.9                                              | ≥ 72 hours                                                     |                                       |
| Gilman et al., 2016a                                      | 20.6                      | 0.55                                          |                                         |                               | 2.3                    | 10.8                                                                         | 322.9                                              | ≥ 12 hours                                                     |                                       |
| Gilman et al. 2016b                                       | 21.4                      | 0.5                                           |                                         |                               | 6.34                   | 15.6                                                                         | 1305.5                                             | ≥ 12 hours                                                     |                                       |
| Gilman et al. 2016c                                       | 20.6                      | 0.55                                          | 0.5                                     |                               | 4.3                    | 11.2                                                                         | 626.1                                              | ≥ 12 hours                                                     |                                       |
| Heitzeg et al.                                            | 19.8                      | 0.4                                           | 0.2                                     |                               | 6.4                    | 9.3                                                                          | 618.1                                              | ≥ 48 hours                                                     |                                       |
| Migliorini et al.                                         | 16.5                      | 0.33                                          | 0.73                                    |                               |                        |                                                                              | 338.9                                              | ≥ 72 hours                                                     |                                       |
| Abdullaev et al.                                          | 19.5                      | 0.29                                          |                                         |                               | 5.1                    | 11                                                                           | 673                                                | ≥ 48 hours                                                     |                                       |
| Cyr et al.                                                | 18.9                      | 0.39                                          | 1                                       |                               | 3.6                    | 20.7                                                                         | 971.4                                              | ≥ 12 hours                                                     | 3.71                                  |
| Zhou et al. 2019 (Dependent CU group)                     | 22.9                      | 0                                             | 1                                       |                               | 5.15                   |                                                                              |                                                    | ≥ 24 hours                                                     | 1.66                                  |
| Zhou et al. 2019                                          | 21.5                      | 0                                             | 0                                       |                               | 4.62                   |                                                                              |                                                    | ≥ 24 hours                                                     | 3.47                                  |

|                                            |      |      |      |      |      |       |        |            |      |
|--------------------------------------------|------|------|------|------|------|-------|--------|------------|------|
| (Non-Dependent CU group)                   |      |      |      |      |      |       |        |            |      |
| Lopez-Larson et al.                        | 18   | 0.08 |      |      | 2.9  | 40    | 1501   | ≥12 hours  |      |
| Behan et al.                               | 16.5 | 0.06 | 1    |      | 6.5  |       |        | ≥12 hours  |      |
| Acheson et al.                             | 17.6 | 0.24 |      |      |      | 26.8  |        | ≥12 hours  |      |
| DeBellis et al.                            | 16.4 | 0    | 1    |      |      |       |        | ≥30 days   | 134  |
| Claus et al.                               | 16   | 0.28 |      |      |      | 16.1  |        | ≥24 hours  |      |
| Jager et al. 2010                          | 17.2 | 0    |      |      | 4    |       | 2003   | ≥24 hours  | 35.7 |
| Leiker et al.                              | 16   | 0.37 | 0.28 | 5.48 |      |       |        | ≥30 days   |      |
| Blair et al., 2019 (LT)                    | 16.4 | 0.51 | 0.32 | 6.39 |      |       |        | ≥30 days   |      |
| Aloi et al., 2021b (novelty task)          | 16.7 | 0.39 | 0.52 | 9.1  |      |       |        | ≥30 days   |      |
| Aloi et al., 2018 (affective stroop)       | 16.1 | 0.38 | 0.35 | 7.0  |      |       |        | ≥30 days   |      |
| Aloi et al., 2019 (MID task)               | 16.1 | 0.39 | 0.37 | 7.31 |      |       |        | ≥30 days   |      |
| Aloi et al., 2020 (PAT)                    | 16.1 | 0.36 | 0.44 | 8.47 |      |       |        | ≥30 days   |      |
| Blair et al., 2021 (RT)                    | 16.5 | 0.34 | 0.5  | 9.26 |      |       |        | ≥30 days   |      |
| Zimmerman et al., 2017                     | 21.2 | 0    | 0.13 |      | 4.28 | 23    | 1233   | ≥48 hours  | 3.58 |
| Ford et al. 2014 (focus on MJ + MDD group) | 20.1 | 0.31 |      |      |      | 21.3  |        |            |      |
| Ames et al.                                | 21.1 | 0.18 |      |      |      |       | 500    | ≥24 hours  |      |
| Jacobsen et al. 2007                       | 17.3 | 0.15 |      |      | 3.7  | 44.8  | 847.1  | ≥30 days   |      |
| Jager et al., 2013                         | 17.2 | 0    |      |      | 4    |       | 2003   | ≥24 hours  | 35.7 |
| May et al. 2020a                           | 16.6 | 0.28 | 0.41 |      |      |       | 231.5  | ≥72 hours  | 45.2 |
| Kroon et al.                               | 21   | 0.74 |      |      | 5.64 | 19.52 | 862.8  | ≥24 hours  | 1.28 |
| Hatchard et al., 2014                      | 20   | 0.4  |      |      | 4.55 | 45.92 |        | Ad-lib use |      |
| Raymond et al., 2020                       | 21.2 | 0.53 |      | 13.4 | 4.7  | 20.8  | 1270.9 | ≥12 hours  | 1.3  |

|                                             |      |      |      |      |      |      |     |           |  |
|---------------------------------------------|------|------|------|------|------|------|-----|-----------|--|
| Thayer et al., 2015                         | 16   | 0.26 |      |      | 4.49 | 4.5  | 243 |           |  |
| Aloi et al., 2021a (COT)                    | 16.3 | 0.43 | 0.59 | 10.3 |      |      |     | ≥30 days  |  |
| Tervo-Clemmens et al., 2018                 | 15.6 | 0.45 |      |      | 1.91 |      |     | ≥24 hours |  |
| Cousijn et al., 2012a (drug cue reactivity) | 21.4 | 0.35 | 0.52 | 12.6 | 2.5  | 20   | 650 | ≥24 hours |  |
| Cousijn et al., 2012b (Approach bias)       | 21.3 | 0.36 |      | 12.4 | 2.5  | 19.6 | 637 | ≥24 hours |  |
| Cousijn et al., 2013 (IGT)                  | 21.4 | 0.34 |      | 12.2 | 2.5  | 16   | 520 | ≥24 hours |  |

**Note:** Unfilled/blank boxes in the table represent studies where the variable of interest was not reported/provided or could not be calculated from other items. <sup>A</sup>There was a large amount variability in how current and lifetime cannabis use frequency was assessed and reported across studies (e.g., different reported cannabis outcomes: number of joints vs. grams vs. use episodes vs. occasions vs. days used; different reported time windows: past week, past-28-days, past-30-days, past-month, past-3-months, past-year, lifetime). For our meta-regression analyses, we attempted to create harmonized current and lifetime cannabis use frequency variable across studies focusing on days/occasions of use in the past 30 days, averaged over the past-3-months (for current use) and days/occasions of lifetime use (for lifetime use) but these estimates were unreliable. Given this, we elected to not conduct formal meta-regression analyses using these variables instead choosing to conduct meta-regression analyses on two variables that we thought were more reliable – CUD diagnoses, CUDIT scores, and duration of CU. CUD diagnoses made by clinician or by research staff using semi-structured interviews. CUDIT is a validated measure of CUD severity. Duration of CU does have more variability than CUD and CUDIT but was retained because it is easier to recall for informants and to approximate compared to lifetime use episodes. Still, it is important to note that this variable did have some cross-study variation as some studies reported duration of regular use and others reported duration of use and other studies reported on age of cannabis initiation or age of onset of regular use and this was subtracted from these youth's current age to calculate a duration of use variable. Given the high degree of variability in outcomes and reporting - the field should work toward developing and using a common outcome set (COS) of validated measures and outcome variables for use in future studies.

**Table S3.** Controlling for covariates/confounders across studies included in the Meta-analysis

| Studies                  | Attempted to Control for alcohol use | Attempted to Control for tobacco use | Excluded youth with comorbid psychiatric disorders                                                                                            | Excluded youth with psychotropic medication use |
|--------------------------|--------------------------------------|--------------------------------------|-----------------------------------------------------------------------------------------------------------------------------------------------|-------------------------------------------------|
| Padula et al. 2007       | No                                   | No                                   | Yes (excluded adolescents with psychiatric comorbidities, ADHD, conduct disorder, and substance use disorders other than alcohol or cannabis) | Yes                                             |
| Schweinsburg et al. 2005 | Yes                                  | No                                   | Yes (excluded adolescents with psychiatric comorbidities, ADHD, substance use disorders)                                                      | Not reported                                    |

|                                |                                                                                                        |                                                                                                             |                                                                                                                                                                 |                                          |
|--------------------------------|--------------------------------------------------------------------------------------------------------|-------------------------------------------------------------------------------------------------------------|-----------------------------------------------------------------------------------------------------------------------------------------------------------------|------------------------------------------|
|                                |                                                                                                        |                                                                                                             | other than alcohol or cannabis and conduct disorder)                                                                                                            |                                          |
| Schweinsburg et al. 2008       | Yes                                                                                                    | No                                                                                                          | Yes (excluded adolescents with psychiatric comorbidities, ADHD, substance use disorders other than alcohol or cannabis, tobacco use disorder)                   | Not reported                             |
| Schweinsburg et al. 2010 (SWM) | Yes, examined relationship between BOLD response and potentially confounding factors (other SU and CD) | No                                                                                                          | Yes (excluded adolescents with history of Axis I psychiatric comorbidities, ADHD, substance use disorders other than alcohol or cannabis, tobacco use disorder) | Not reported                             |
| Smith et al.                   | Yes                                                                                                    | Yes, controlled for nicotine use                                                                            | Yes, screened out youth with Axis I psychiatric disorders or tested positive for cocaine, opiates, amphetamines                                                 | Not reported                             |
| Tapert et al. 2007             | No                                                                                                     | Yes, completed Fagerstorm test for Nicotine Dependence                                                      | Yes (excluded adolescents with psychiatric comorbidities, ADHD, conduct disorder, substance use disorders other than alcohol or cannabis, tobacco use disorder) | Yes                                      |
| Berk et al. 2015               | No                                                                                                     | Yes, partially. The authors ran supplemental analyses examining cigarette use as predictor of BOLD response | Yes, screened out youth with Axis I psychiatric disorders or substance use disorders other than alcohol or cannabis                                             | Yes                                      |
| Gilman et al. 2016a            | No                                                                                                     | No                                                                                                          | Yes, excluded if pt met criteria for Axis I and II, except CUD                                                                                                  | No participant was taking any medication |
| Gilman et al. 2016b            | No                                                                                                     | No                                                                                                          | Yes, excluded. All participants were healthy, no current psych diagnosis                                                                                        | NP                                       |
| Gilman et al. 2016c            | No                                                                                                     | No                                                                                                          | Yes, excluded those who meet criteria for DSM-4 Axis I disorder                                                                                                 | NP                                       |



|                                         |                                                                            |                                                                              |                                                                                                                                                                                                        |                                                 |
|-----------------------------------------|----------------------------------------------------------------------------|------------------------------------------------------------------------------|--------------------------------------------------------------------------------------------------------------------------------------------------------------------------------------------------------|-------------------------------------------------|
| Heitzeg et al.                          | Yes, identified controls with similar alcohol/nicotine use                 | Yes, identified controls with similar alcohol/nicotine use                   | Presence of active primary Axis I disorder were exclusion, however untreated mood, anxiety, APD and SUD were included                                                                                  | Yes                                             |
| Migliorini et al.                       | Yes                                                                        | No                                                                           | Excludes pts with presence of any DSM-IV axis I psychiatric disorder                                                                                                                                   | Yes                                             |
| Abdullaev et al.                        | Yes, excluded from control and MJ group if they used alcohol >1-2 day/week | “also excluded if they reported using other drugs”, doesn’t specify nicotine | NP                                                                                                                                                                                                     | NP                                              |
| Cyr et al.                              | Yes                                                                        | No                                                                           | Did not exclude DSM-5                                                                                                                                                                                  | NP                                              |
| Zhou et al. 2019 Dependent MJ Group     | Controlled for alcohol use                                                 | Controlled for nicotine use                                                  | Exclusion of DSM-IV Axis I and II, DBI >20, current medical disorder                                                                                                                                   | Yes, excluded pts currently taking medication   |
| Zhou et al. 2019 Non-Dependent MJ group | Controlled for alcohol use                                                 | Controlled for nicotine use                                                  | Exclusion of DSM-IV Axis I and II, DBI >20, current medical disorder                                                                                                                                   | Yes, excluded pts currently taking medication   |
| Lopez-Larson et al.                     | Yes, excluded pt with alcohol dependence (2 months prior to scan)          | No                                                                           | Health controls – excluded DSM-IV axis I dx, does not mention MJ group having similar exclusion criteria, with exception of exclusion for autism, schizophrenia, anorexia, and drug/alcohol dependence | No                                              |
| Behan et al.                            | Yes, controlled for alcohol use                                            | Yes, controlled for nicotine use                                             | Participants were screened for no history of neurological/psychiatric illness or any past loss of consciousness which required hospitalization.                                                        | NP                                              |
| Acheson et al.                          | Yes, controlled for alcohol use                                            | Yes, controlled for nicotine use                                             | Exclusionary criteria included physical or neurological conditions that would interfere with task performance, DSMI V Axis I psychiatric disorder (other than cannabis use disorders)                  | NP                                              |
| DeBellis et al.                         | Yes, controlled for alcohol use                                            | Yes, controlled for nicotine use                                             | Exclusion criteria for subjects were medical,                                                                                                                                                          | No subjects were taking psychotropic medication |

|                                          |                                 |                                       |                                                                                                                                                                                                                   |                                                                                                                                                                                                                                                     |
|------------------------------------------|---------------------------------|---------------------------------------|-------------------------------------------------------------------------------------------------------------------------------------------------------------------------------------------------------------------|-----------------------------------------------------------------------------------------------------------------------------------------------------------------------------------------------------------------------------------------------------|
|                                          |                                 |                                       | pervasive developmental or psychotic disorder                                                                                                                                                                     |                                                                                                                                                                                                                                                     |
| Claus et al.                             | Yes, controlled for alcohol use | Yes, reported nicotine use last month | NP                                                                                                                                                                                                                | NP                                                                                                                                                                                                                                                  |
| Jager et al. 2010                        | Yes, controlled for alcohol use | Yes, controlled for nicotine use      | Excluded Axis I except for conduct disorder                                                                                                                                                                       | Yes, use of psychotropic medication was an exclusion criteria                                                                                                                                                                                       |
| Leiker et al. 2019                       | Yes, controlled for alcohol use | Yes, controlled for nicotine use      | Exclusion criteria included PDD, TS, history of psychosis, neurological disorders, head trauma                                                                                                                    | Yes, excluded patients taking medication with psychotropic effects                                                                                                                                                                                  |
| Blair et al., 2019 (Looming Threat task) | Yes, controlled for alcohol use | Yes, controlled for nicotine use      | Current psychiatric conditions (other than psychotic disorders or pervasive developmental disorders) were not exclusionary.                                                                                       | Use of psychotropic medications for psychiatric indications (e.g., stimulants, selective serotonin reuptake inhibitors) were not exclusory. However, participants on stimulant medication were asked to withhold medication on the day of scanning. |
| Aloi et al., 2021b (novelty task)        | Did not control for alcohol use | Did not control for nicotine use      | Current psychiatric conditions (other than psychotic disorders or pervasive developmental disorders) were not exclusionary.                                                                                       | Use of psychotropic medications for psychiatric indications (e.g., stimulants, selective serotonin reuptake inhibitors) were not exclusory. However, participants on stimulant medication were asked to withhold medication on the day of scanning. |
| Aloi et al. 2018 (affective stroop task) | Yes, controlled for alcohol use | NP                                    | Exclusion criteria included pervasive developmental disorder, Tourette's syndrome, lifetime history of psychosis, neurological disorder, head trauma, and non-psychiatric medical illnesses requiring medications | Excluded non-psychiatric medical illnesses requiring medications that may have psychotropic effects                                                                                                                                                 |

|                                            |                                 |                                  |                                                                                                                                                                                                           |                                                                                                                                                                                                                                                                                   |
|--------------------------------------------|---------------------------------|----------------------------------|-----------------------------------------------------------------------------------------------------------------------------------------------------------------------------------------------------------|-----------------------------------------------------------------------------------------------------------------------------------------------------------------------------------------------------------------------------------------------------------------------------------|
|                                            |                                 |                                  | that may have psychotropic effects                                                                                                                                                                        |                                                                                                                                                                                                                                                                                   |
| Aloi et al. 2019 (MID task)                | Yes, controlled for alcohol use | Yes, controlled for nicotine use | Current psychiatric conditions (other than psychotic disorders or pervasive developmental disorders) were not exclusionary                                                                                | Current psychotropic use were not exclusionary, except asked to hold stimulant for those on stimulants                                                                                                                                                                            |
| Aloi et al., 2020 (passive avoidance task) |                                 |                                  | Current psychiatric conditions (other than psychotic disorders or pervasive developmental disorders) were not exclusionary                                                                                | Current psychotropic use were not exclusionary, except asked to hold stimulant for those on stimulants                                                                                                                                                                            |
| Blair et al., 2021 (retaliation task)      | Yes, controlled for alcohol use | NP                               | Did not exclude those with psychiatric disorder                                                                                                                                                           | NP                                                                                                                                                                                                                                                                                |
| Zimmerman et al., 2017                     | Yes, controlled for alcohol use | Yes, controlled for nicotine use | Exclusion criteria for all participants history of psychiatric disorder according to DSM-IV criteria (assessed using the Mini-International Neuropsychiatric Interview (M.I.N.I.), Sheehan et al. [1998]) | Excluded regular or current use of psychoactive                                                                                                                                                                                                                                   |
| Ford et al. 2014 MJ Group                  | Yes, controlled for alcohol use | Yes, controlled for tobacco use  | No participants in the MJ group met criteria for a current or past depressive episode                                                                                                                     | NP                                                                                                                                                                                                                                                                                |
| MDD + MJ Group                             | Yes, controlled for alcohol use | Yes, controlled for tobacco use  | Participants met criteria for MDD + MJ                                                                                                                                                                    | The participants included in the MDD group met current criteria for a major depressive episode, while those in the MDD + MJ groups met diagnostic criteria for either current or past MDD, and a total of 13 participants were taking psychoactive medications (primarily SSRIs). |
| Ames et al. 2013                           | No                              | No                               | Participants excluded if they have a psychiatric disorder                                                                                                                                                 | Excluded if using psychotropic medication                                                                                                                                                                                                                                         |
| Jacobsen et al. 2007                       | Yes, controlled for alcohol use | Yes, controlled for nicotine use | All participants were recruited from the community and were free of medical and                                                                                                                           | All participants were recruited from the community and were free of medical and                                                                                                                                                                                                   |

|                                                                |                                 |                                      |                                                                                                                                                                                                            |                                                                                      |
|----------------------------------------------------------------|---------------------------------|--------------------------------------|------------------------------------------------------------------------------------------------------------------------------------------------------------------------------------------------------------|--------------------------------------------------------------------------------------|
|                                                                |                                 |                                      | psychiatric illness and substance abuse or dependence disorders                                                                                                                                            | psychiatric illness and substance abuse or dependence disorders                      |
| Schweinsburg et al. 2011 (verbal paired word association test) | Yes, controlled for alcohol use | No participants were regular smokers | Exclusions were teen history of medical or neurological disorders, DSM-IV psychiatric diagnoses other than alcohol or marijuana use disorder                                                               | NP                                                                                   |
| Jager et al., 2013                                             | Yes, controlled for alcohol use | Yes, controlled for nicotine use     | Axis I psychiatric diagnosis, except for conduct disorder (which is a common diagnosis in cannabis using boys)                                                                                             | Excluded use of psychotropic medication                                              |
| May et al. 2020                                                | Yes, controlled for alcohol     | Yes, controlled for nicotine         | Participants were excluded if they endorsed any of the following: (1) lifetime Diagnostic and Statistical Manual (DSM-5) of Mental Disorders psychiatric disorder (other than substance use disorder, SUD) | Excluded patients with current use of psychoactive medication                        |
| Kroon et al. 2021                                              | Yes, controlled for alcohol use | Yes, controlled for nicotine use     | Exclusion criteria mental health (major axis-1 disorders) problems, and previous or current treatment for CUD or plans to enter treatment.                                                                 | Exclusion criteria current use of prescription or illicit psychoactive drugs         |
| Hatchard et al. 2014                                           | Yes, controlled for alcohol use | Yes, controlled for nicotine use     | Excluded participants that met diagnostic criteria for an Axis I diagnosis from the Diagnostic and Statistical Manual of Mental Disorders (DSM)                                                            | NP                                                                                   |
| Raymond et al. 2020                                            | Yes, controlled for alcohol use | NP                                   | All participants had to be free of psychological disorders (with the exception of cannabis use disorder for the CB group)                                                                                  | NP                                                                                   |
| Thayer et al. 2015                                             | Yes, controlled for alcohol use | NP                                   | Participants were not specifically excluded on the basis of any psychiatric disorders                                                                                                                      | But excluded rather only if they indicated psychotropic medication use suggestive of |

|                             |                                 |                                        |                                                                                                                                                                |                                                                                                                                               |
|-----------------------------|---------------------------------|----------------------------------------|----------------------------------------------------------------------------------------------------------------------------------------------------------------|-----------------------------------------------------------------------------------------------------------------------------------------------|
|                             |                                 |                                        | including Attention Deficit Hyperactivity Disorder (ADHD)                                                                                                      | greater severity of psychopathology.                                                                                                          |
| Aloi et al. 2021a (CO Task) | Yes, controlled for alcohol use | NP                                     | Current psychiatric conditions (other than psychotic disorders or PDD) were not exclusionary                                                                   | . Use of psychotropic medications for psychiatric indications (e.g., stimulants, selective serotonin reuptake inhibitors) were not exclusory. |
| Tervo-Clemmens et al. 2018  | Yes, controlled for alcohol use | NP                                     | Excluded current psychiatric disorder                                                                                                                          | Excluded current psychotropic medication use                                                                                                  |
| Cousijn et al. 2012a        | Yes                             | Yes                                    | Excluded major medical disorders or a history of major type I psychiatric disorders, which was assessed with the Mini-International Neuropsychiatric Interview | NP                                                                                                                                            |
| Cousijn et al. 2012b        | Yes, controlled for alcohol use | No, could not control for nicotine use | Excluded major medical disorders or a history of major type I psychiatric disorders, which was assessed with the Mini-International Neuropsychiatric Interview | NP                                                                                                                                            |
| Cousijn et al. 2013         | Yes                             | Yes                                    | Excluded major medical disorders or a history of major type I psychiatric disorders, which was assessed with the Mini-International Neuropsychiatric Interview | NP                                                                                                                                            |

Abbreviation: NP = not provided

| <b>Table S4.</b> Proportion of CU Youth with Psychiatric Diagnoses of CUD, AUD, Tobacco Smoking, Depressive disorders, Anxiety disorders, ADHD, and CD/ASPD <sup>a</sup> |                                                                 |                                                                  |                                                                        |                                                      |                                                  |                                               |                                             |                                                                        |
|--------------------------------------------------------------------------------------------------------------------------------------------------------------------------|-----------------------------------------------------------------|------------------------------------------------------------------|------------------------------------------------------------------------|------------------------------------------------------|--------------------------------------------------|-----------------------------------------------|---------------------------------------------|------------------------------------------------------------------------|
| <b>Studies</b>                                                                                                                                                           | <b>Diagnostic Assessments<sup>b</sup></b>                       | <b>Proportion of CUD</b>                                         | <b>Proportion of AUD</b>                                               | <b>Proportion of tobacco smokers</b>                 | <b>Proportion of depressive disorders or MDD</b> | <b>Proportion of anxiety disorders or GAD</b> | <b>Proportion of ADHD (across subtypes)</b> | <b>Proportion of conduct disorders/ASPD</b>                            |
| Padula et al. 2007                                                                                                                                                       | Computerized DISC-PS-4.32                                       | NP                                                               | 0.12<br>(2/17)                                                         | NP                                                   | 0.00<br>(0/17)                                   | 0.00<br>(0/17)                                | 0.00<br>(0/17)                              | 0.00<br>(0/17)                                                         |
| Schweinsburg et al. 2005                                                                                                                                                 | CDDR and DISC                                                   | 1.0<br>(15/15)                                                   | 1.0<br>(15/15)                                                         | 0.46                                                 | 0.00<br>(0/15)                                   | 0.00<br>(0/15)                                | 0.00<br>(0/15)                              | 0.27                                                                   |
| Schweinsburg et al. 2008                                                                                                                                                 | Computerized DISC-PS-4.32                                       | NP                                                               | 0.27<br>(4/15)                                                         | 0.27<br>(4/15)<br>(past month tobacco use)           | 0.00<br>(0/15)                                   | 0.00<br>(0/15)                                | 0.00<br>(0/15)                              | 0.00<br>(0/15)                                                         |
| Schweinsburg et al., 2011 (VPAT)                                                                                                                                         | DISC                                                            | 0.66 (average from MJ only (n=8) = 0.50 and MJ+BD (n=28) = 0.71) | 0.28 (average from MJ only (n=8) = 0.0 and MJ+BD (n=28) = 0.36)        | NP                                                   | 0.00                                             | 0.00                                          | 0.00                                        | 0.00                                                                   |
| Schweinsburg et al. 2010 (SWM)                                                                                                                                           | DISC                                                            | NP                                                               | .10<br>(estimated as 2.5/26 from 5 of 26 MJ patients having AUD or CD) | NP                                                   | 0.0                                              | 0.0                                           | 0.0                                         | .10<br>(estimated as 2.5/26 from 5 of 26 MJ patients having AUD or CD) |
| Smith et al. 2010                                                                                                                                                        | Computerized DISC                                               | NP                                                               | 0.0                                                                    | 0.7<br>(7/10 current smokers)                        | 0.00<br>(0/10)                                   | 0.00<br>(0/10)                                | 0.00<br>(0/10)                              | 0.00<br>(0/10)                                                         |
| Tapert et al. 2007                                                                                                                                                       | DISC-PS-4.23<br>CDDR                                            | NP                                                               | 0.0                                                                    | NP                                                   | 0.00<br>(0/16)                                   | 0.00<br>(0/16)                                | 0.00<br>(0/16)                              | 0.00<br>(0/16)                                                         |
| Berk et al. 2015                                                                                                                                                         | SSADDA and clinical assessment by psychiatrist and psychologist | 0.73 (11/15)                                                     | 0.27 (4/15)                                                            | NP                                                   | 0.00<br>(0/15)                                   | 0.00<br>(0/15)                                | 0.00<br>(0/15)                              | 0.00<br>(0/15)                                                         |
| Gilman et al. 2016a (Social Influence Task)                                                                                                                              | SCID                                                            |                                                                  | 0.00<br>(0/20)                                                         | 0.35<br>(7/20 occasional smokers)                    | 0.00<br>(0/20)                                   | 0.00<br>(0/20)                                | 0.00<br>(0/20)                              | 0.00<br>(0/20)                                                         |
| Gilman et al. 2016b (Social Influence DM task)                                                                                                                           | SCID                                                            |                                                                  | 0.00<br>(0/20)                                                         | 0.40<br>(8/20 occasional smokers; 1/20 daily smoker) | 0.00<br>(0/20)                                   | 0.00<br>(0/20)                                | 0.00<br>(0/20)                              | 0.00<br>(0/20)                                                         |
| Gilman et al. 2016c (Cyberball Social Exclusion task)                                                                                                                    | SCID                                                            | 0.50 (8/20) Cannabis abuse – 0.40 Cannabis dependence – 0.20     | 0.00<br>(0/20)                                                         | 0.00<br>(0/20 regular smokers)                       | 0.00<br>(0/20)                                   | 0.00<br>(0/20)                                | 0.00<br>(0/20)                              | 0.00<br>(0/20)                                                         |

|                          |                                                                                                                         |                                                    |                                                     |                                         |             |              |             |                        |
|--------------------------|-------------------------------------------------------------------------------------------------------------------------|----------------------------------------------------|-----------------------------------------------------|-----------------------------------------|-------------|--------------|-------------|------------------------|
| Heitzeg et al. 2015      | DISC <18; DIS-Version IV for >18 yo                                                                                     | 0.20 (4/20)                                        | 0.35 (7/20)                                         | 0.35 (7/20 current smokers)             | 0.30 (6/20) | 0.30 (6/20)  | NP          | 0.35 (7/20)<br>*APD dx |
| Migliorini et al. 2013   | SSADDA and DISC                                                                                                         | 0.73 (11/15)                                       | 0.27 (4/15)                                         | NP                                      | 0.0         | 0.0          | 0.0         | 0.0                    |
| Abdullaev et al. 2010    | NP                                                                                                                      | NP                                                 | NP                                                  | NP                                      | NP          | NP           | NP          | NP                     |
| Cyr et al. 2019          | SCID-I and K-SADS-PL                                                                                                    | 1.0 (Cannabis abuse 0.43 Cannabis dependence 0.61) | 0.04 (1/28)                                         | NP                                      | 0.07 (2/28) | 0.04 (1/28)  | 0.17 (4/28) | NP                     |
| Zhou et al. 2019-DEP     | MINI for DSM-IV                                                                                                         | 1.00 (100% lifetime cannabis dependence) (18/18)   | NP                                                  | 0.94 (17/18 tobacco smokers)            | 0.00        | 0.00         | 0.00        | 0.00                   |
| Zhou et al. 2019-ND      | MINI for DSM-IV                                                                                                         | 0.0 (20/20)                                        | NP                                                  | .70 (14/20 tobacco smokers)             | 0.00        | 0.00         | 0.00        | 0.00                   |
| Lopez-Larson et al. 2012 | SCIDS-P, K-SADS-PL, Diagnostic semi structured interview by board certified child psychiatrist or licensed psychologist | NP                                                 | 0.17 (4/24 current alcohol abuse)                   | 0.33 (4/24 current tobacco users)       | 0.00        | 0.00         | 0.00        | 0.00                   |
| Behan et al. 2014        | WHO CIDI-SF                                                                                                             | 1.0 (17/17)                                        | NP                                                  | NP                                      | 0.00        | 0.00         | 0.00        | 0.00                   |
| Acheson et al. 2015      | SCID for DSM-IV and assessment of psychiatric health and drug/alcohol use history                                       | NP                                                 | 0.0 (0/14 AUD diagnosis; 4/14 drank alcohol weekly) | 0.36 (5/14 current tobacco use)         | 0.00        | 0.00         | 0.00        | 0.00                   |
| DeBellis et al. 2013     | KSADS-PL                                                                                                                | 1.0 (15/15)                                        | 0.26 (4/15)                                         | 0.26 (4/15)                             | 0.60 (9/15) | 0.73 (11/15) | 0.47 (7/15) | 0.53 (8/15)            |
| Claus et al. 2018        | Risky Behavior questionnaire and Time Line Follow-Back                                                                  | NP                                                 | NP                                                  | 0.67 (avg. across MJ and MJ+ALC groups) | NP          | NP           | NP          | NP                     |
| Jager et al. 2010        | C-DISC                                                                                                                  | NP                                                 | NP                                                  | NP                                      | 0.00 (0/12) | 0.00 (0/12)  | 0.00 (0/12) | 0.75 (9/12)            |

|                                               |                                                                                                                      |                             |                             |                         |                |                |                |                |
|-----------------------------------------------|----------------------------------------------------------------------------------------------------------------------|-----------------------------|-----------------------------|-------------------------|----------------|----------------|----------------|----------------|
| Leiker et al. 2019                            | Clinical interviews by licensed psychiatrist + CUDIT AUDIT                                                           | 0.28<br>(29/104)<br>CUDIT>8 | 0.23<br>(7/104)<br>AUDIT>4  | NP                      | 0.17           | 0.25           | 0.49           | 0.38           |
| Blair et al., 2019<br>(Looming Threat task)   | Clinical interviews by licensed psychiatrist + CUDIT AUDIT                                                           | 0.32<br>(28/87)<br>CUDIT>8  | 0.24<br>(21/87)<br>AUDIT>4  | NP                      | 0.22           | 0.39           | 0.52           | 0.53           |
| Aloi et al., 2021b<br>(novelty task)          | Clinical interviews by licensed psychiatrist + CUDIT AUDIT                                                           | 0.52<br>(67/128)<br>CUDIT>6 | 0.31<br>(40/128)<br>AUDIT>4 | NP                      | 0.17           | 0.34           | 0.50           | 0.48           |
| Aloi et al. 2018<br>(affective stroop task)   | Clinical interviews by licensed psychiatrist + CUDIT AUDIT                                                           | 0.35<br>(29/82)<br>CUDIT>8  | 0.26<br>(21/82)<br>AUDIT>4  | NP                      | 0.26           | 0.30           | 0.52           | 0.52           |
| Aloi et al. 2019 (MID task)                   | Clinical interviews by licensed psychiatrist + CUDIT AUDIT                                                           | 0.37<br>(56/150)<br>CUDIT>8 | 0.31<br>(38/150)<br>AUDIT>4 | NP                      | 0.29           | 0.24           | 0.53           | 0.51           |
| Aloi et al., 2020<br>(passive avoidance task) | Clinical interviews by licensed psychiatrist + CUDIT AUDIT                                                           | 0.44<br>(62/141)<br>CUDIT>8 | 0.31<br>(43/141)<br>AUDIT>4 | NP                      | 0.15           | 0.28           | 0.53           | 0.47           |
| Blair et al., 2021<br>(retaliation task)      | Clinical interviews by licensed psychiatrist + CUDIT AUDIT                                                           | 0.50<br>(51/102)<br>CUDIT>8 | 0.29<br>(30/102)<br>AUDIT>4 | NP                      | 0.14           | 0.31           | 0.51           | 0.49           |
| Zimmerman et al., 2017                        | MINI                                                                                                                 | 0.13<br>(3/23)              | 0.0                         | 0.74<br>(17/23 smokers) | 0.00           | 0.00           | 0.00           | 0.00           |
| Ford et al. 2014<br>MDD+ MJ Group             | Clinical interview by licensed psychiatrist confirmed by SCID for DSM-IV                                             | NP                          | NP                          | NP                      | 1.00           | NP             | NP             | NP             |
| Ames et al. 2013                              | Patient self-reported history of psychiatric or neurologic disorders and heavy drinking done via screening questions | NP                          | NP                          | NP                      | NP             | NP             | NP             | NP             |
| Jacobsen et al. 2007                          | SCID                                                                                                                 | NP                          | NP                          | 1.00<br>(20/20)         | 0.00<br>(0/20) | 0.00<br>(0/20) | 0.00<br>(0/20) | 0.00<br>(0/20) |
| Jager et al., 2013                            | C-DISC                                                                                                               | NP                          | NP                          | NP                      | 0.00           | 0.00           | 0.00           | 0.43<br>(9/21) |



|                                |                                                                                                                                                                     |                                                                                           |                                  |                                         |      |      |      |      |
|--------------------------------|---------------------------------------------------------------------------------------------------------------------------------------------------------------------|-------------------------------------------------------------------------------------------|----------------------------------|-----------------------------------------|------|------|------|------|
| May et al. 2020                | Clinical interview<br>SSADDA                                                                                                                                        | 0.41<br>Avg. across groups -<br>CAN+ALC-SUD<br>group: 0.92;<br>CAN+ALC-EXP<br>group: 0.00 | 0.61                             | NP                                      | 0.00 | 0.00 | 0.00 | 0.00 |
| Kroon et al. 2021              | Pt self-reported<br>psychiatric history done<br>via telephone screening                                                                                             | NP                                                                                        | 0.0<br>0 with AUDIT > 12         | 0.47                                    | NP   | NP   | NP   | NP   |
| Hatchard et al. 2014           | Parent and Patient<br>Assessments conducted<br>as part of Ottawa<br>Prenatal Prospective<br>Study; no details on<br>specific questions or<br>diagnostic assessments | NP                                                                                        | NP                               | 0.7<br>(7/10<br>cigarette<br>smokers)   | 0.00 | 0.00 | 0.00 | 0.00 |
| Raymond et al. 2020            | SCID                                                                                                                                                                | NP                                                                                        | NP                               | NP                                      | 0.00 | 0.00 | 0.00 | 0.00 |
| Thayer et al. 2015             | Substance use history<br>through self-report                                                                                                                        | NP                                                                                        | NP                               | NP                                      | NP   | NP   | NP   | NP   |
| Aloi et al. 2021a (CO<br>Task) | Clinical interviews by<br>licensed psychiatrist +<br>CUDIT<br>AUDIT                                                                                                 | 0.59<br>(61/104)<br>CUDIT>8                                                               | 0.43<br>(45/104)<br>AUDIT>4      | 0.15<br>(16/104)                        | 0.26 | 0.27 | 0.46 | 0.50 |
| Tervo-Clemmens et<br>al. 2018  | MINI                                                                                                                                                                | NP                                                                                        | 0.0                              | 0.05<br>(1/22<br>cigarette<br>user)     | 0.00 | 0.00 | 0.00 | 0.00 |
| Cousijn et al. 2012a           | MINI for DSM-IV,<br>CUDIT, AUDIT                                                                                                                                    | .52<br>(16/31 cannabis abuse<br>or dependence)                                            | 0.0<br>AUDIT > 8<br>exclusionary | 0.68<br>(cigarette<br>smoker<br>status) | 0.00 | 0.00 | 0.00 | 0.00 |

|                      |                                  |    |                                  |                                         |      |      |      |      |
|----------------------|----------------------------------|----|----------------------------------|-----------------------------------------|------|------|------|------|
| Cousijn et al. 2012b | MINI for DSM-IV,<br>CUDIT, AUDIT | NP | 0.0<br>AUDIT > 8<br>exclusionary | 0.70<br>(cigarette<br>smoker<br>status) | 0.00 | 0.00 | 0.00 | 0.00 |
| Cousijn et al. 2013  | MINI for DSM-IV,<br>CUDIT, AUDIT | NP | 0.0<br>AUDIT > 8<br>exclusionary | 0.69<br>(cigarette<br>smoker<br>status) | 0.00 | 0.00 | 0.00 | 0.00 |

a= Proportion of CU youth with respective psychiatric diagnoses from each study are presented as a proportion with 0.75 representing 75% of youth from the CU sample. The number of participants with each diagnosis and the total number of CU Youth in each study is shown in ( ) below the proportions (e.g. no. participants with X diagnosis / no. CU youth participants). b= Diagnostic Assessment used to obtain the psychiatric diagnoses for participants in each study. Abbreviations: ADHD = Attention Deficit/Hyperactivity Disorder; ASPD = Antisocial Personality Disorder; AUD = Alcohol Use Disorder; CD = Conduct Disorder; CUD = Cannabis Use Disorder; TUD = Tobacco Use Disorder; CUDIT = Cannabis Use Disorder Identification Test; AUDIT = Alcohol Use Disorder Identification Test; NP = Not provided; DSM = Diagnostic and Statistical Manual of Psychiatric Disorders; Pt = patient; DISC, C-DISC, DISC-PS-4.23 = variations of the Diagnostic Interview Schedule for Children; KSADS, KSADS-PL = versions of the Kiddie Schedule for Affective Disorders and Schizophrenia; MINI = Mini International Neuropsychiatric Interview; SCID = Structured Clinical Interview for DSM Psychiatric Disorders; SSADDA = Semi-Structured Assessment for Drug Dependence and Alcoholism; WHO CIDI-SF = World Health Organization Composite International Diagnostic Interview, short form.

## **Results S1. Qualitative Analysis of Studies of BOLD signal Differences Between Cannabis Using and Non-Using Typically Developing Youth**

*Qualitative summary:* Forty-five studies/experiments using whole-brain voxel-wise analyses to compare BOLD signal differences between CU and TD youth met all inclusion criteria and were included in the qualitative and quantitative analyses. Out of the 45 fMRI studies, 37 (82%) reported either differences between CU and TD youth or brain-behavior associations with CU variables in combined samples. Thirty-six of the 45 fMRI studies reported group-level comparisons between CU and matched non-using TD youth and nine fMRI studies reported results from correlational analyses between brain activation measures (i.e. BOLD signal) and cannabis use outcomes in combined samples of CU and TD youth.

### *Heterogeneity vs. Homogeneity of Experimental Design, Analytic Approaches, and Sample Characteristics of Studies:*

There was heterogeneity across study designs, analytic methods used, and sample characteristics for the 45 studies. Many studies had small samples and were underpowered. A number of studies used region-of-interest (ROI) analyses and small volume corrections (SVCs) in their primary analyses and conducted exploratory whole-brain analyses. For these studies, only results from the exploratory whole-brain analyses were included in the quantitative analysis. A majority of the studies attempted to control for potentially confounding variables either through restricting the study sample, controlling for covariates in the statistical analyses, or taking both of these steps (see eTable S3). Regarding sampling procedures, there was wide variability in inclusion/exclusion (I/E) criteria for co-occurring alcohol and tobacco/cigarette use and comorbid psychiatric disorders across the studies. Generally studies fell into one of two camps with some authors applying strict I/E criteria (i.e., excluding youth with psychiatric disorders) with the goal of having a “clean” CU sample free of comorbid psychiatric conditions that could confound fMRI results and other authors applying more lenient I/E criteria (i.e., including youth with comorbid/co-occurring psychiatric disorders) with the goal of having a generalizable “real-world” CU sample and then controlling for variance related to comorbidity at the analysis stage. The proportion of CU youth with co-occurring/comorbid alcohol use disorder (AUD), regular tobacco/cigarette use, depressive disorders, anxiety disorders, attention deficit/hyperactivity disorder (ADHD), and conduct disorder (CD) or antisocial personality disorder (ASPD) from studies that used standardized or clinical interviews is shown in eTable S4.

Whole-brain Voxel-wise Group-level Comparisons of BOLD effect between CU vs. TD youth: Focusing on the group-level comparisons (n=36 studies): thirty-one studies (86% of the group-comparison subset sample) showed BOLD signal differences between CU and non-using TD youth in whole-brain voxel-wise analyses.

Whole-brain Correlation Analyses in Combined Samples of CU and TD youth: Of the nine studies that investigated relationships between BOLD fMRI signal and cannabis outcomes as their main *a priori* analysis, six (67%) reported significant correlations between cannabis-related variables and brain activation.

Spatial Distribution of Adolescent Cannabis Use Effects and Evidence for Distinct Regional Patterns of Brain Activity Related to Cannabis Use During Adolescence: No global BOLD signal differences were observed. FMRI studies that used whole-brain voxel-wise analyses and showed significant BOLD signal differences between CU and TD youth or brain-behavior correlations reported regionally specific effects which were broadly distributed across prefrontal, temporal, and parietal networks in some studies and narrow/focal to a specific region in others. Cortical and subcortical brain regions that showed BOLD response differences between CU and TD youth across studies included the amygdala, hippocampus, parahippocampal gyrus, nucleus accumbens (NAc), ventral tegmental area (VTA), putamen, caudate, globus pallidus, ventral striatum (VS), brain stem, thalamus, anterior and posterior insula, uncus, culmen, all subsections of the cingulate (dorsal anterior cingulate cortex (dACC), mid-cingulate, posterior cingulate), precuneus, cuneus, lingual gyrus, angular gyrus, postcentral gyrus, fusiform gyrus, rolandic operculum, precentral gyrus, claustrum, declive, superior parietal lobule, inferior parietal lobule (IPL), superior temporal gyrus (STG), temporal pole, middle temporal gyrus (MTG), inferior temporal gyrus (ITG), supramarginal gyrus (SMG), dorsolateral prefrontal cortex (dlPFC), ventral medial prefrontal cortex (vmPFC), orbitofrontal cortex (oPFC), rostral medial prefrontal cortex (rmPFC), dorsal medial prefrontal cortex (dmPFC), frontal pole, middle frontal gyrus (MFG), superior frontal gyrus (SFG), inferior frontal gyrus, supplementary motor area (SMA), Pre-SMA, occipital lobe, middle occipital gyrus, lateral occipital gyrus, cerebellum, and cerebellar lingual gyrus. Across studies activation differences in CU compared to TD youth were most consistently observed in medial prefrontal, cingulate, insula, and temporal cortical regions as well as in subcortical regions implicated in reward and emotion processing. These regions are notable for having elevated expression of CB1 receptors compared to the rest of the brain.

*Does Adolescent Cannabis Use Impact Some Cognitive Domains and Spare Others?* Regarding differences in CU versus TD brain activity for distinct cognitive domains: eTable S1 presents the studies that investigated distinct cognitive domains and subdomains and the results from those studies. As noted above: sixteen, five, nine, eight, and six studies were categorized into EF/CC, DM, SC/EM, REW, and DRUG CUE domains respectively, with fewer than four studies/experiments present in all other domains (1 in MEM, 1 in ATTN, 1 in VS/PM, 2 in AUDITORY, 3 in INT, and 1 in SELF). Group differences and cannabis-related brain-behavior associations were most consistent in EF/CC and SC/EM domains where thirteen out of sixteen (81% of EF/CC experiments) and eight out of nine (89% of SC/EM experiments) showed significant CU vs. TD differences in brain activation. EF/CC studies with positive results frequently showed differences in prefrontal, temporal, and parietal cortical regions with subcortical differences being less common. Positive primary results were less consistent but still present in over 50% of studies/experiments using DM, REW, and DRUG CUE paradigms. For DM under risky conditions, three out of five studies showed positive results. Five out of eight REW studies showed BOLD differences between CU and TD youth with the majority of these studies using reward feedback contrasts. Studies examining drug cue exposure had inconsistent results (3 of 6 experiments showed positive results) although some of this variance may be related to variability in task/paradigm. Of the domains with fewer than four experiments/studies, notable qualitative findings were observed related to interoceptive processing tasks (3 studies, all positive). In examining EF/CC subdomain results: Differences in brain activation between CU and TD groups were consistently observed during WM tasks (8 of 9 positive) and CM tasks (2 of 2 positive) and to a lesser extent during RI tasks (2 of 4 positive). Results of the SC/EM subdomain qualitative analysis indicate that neural responses during the processing of social information (SC: 3 of 4 positive), negative emotional stimuli (emotion reactivity), and when individuals are required to regulate their behaviors when in the presence of negative emotional stimuli (emotional regulation) (EM: 5 of 5 positive) are altered in CU compared to TD youth. Notably, three of four task contrasts assessing neural response to emotional stimuli (a measure of emotional reactivity) (all 3 showing CU < TD) and two of two contrasts assessing emotion regulation (both CU > TD) showed CU vs. TD differences in brain activity. In examining REW subdomain results: It is important to note that while five of eight REW studies showed CU vs. TD BOLD differences, two of these studies only showed positive results as a function of trial accuracy (Aloi et al., 2019) or self-reported novelty (Aloi et al., 2021b) and showed no CU vs. TD differences with traditional reward contrasts (i.e., no main

effect for win vs. loss feedback). Three of six studies (50%) examining reward feedback contrasts showed CU vs. TD group differences. Among reward feedback studies, two reported on outcomes of win vs. neutral feedback (1 of 2 positive) (Jager et al., 2013; De Bellis et al., 2013), one reported on outcomes of both reward vs. neutral and loss vs. neutral feedback (both positive) (Acheson et al., 2015), and three reported on outcomes of win vs. loss feedback (1 of 3 positive) (Aloi et al., 2019; Aloi et al., 2021b; Cousjin et al., 2013). Only one whole-brain study examined reward anticipation (Jager et al., 2013). The results of this study showed no CU vs. TD differences in anticipatory processing during win vs. neutral trials.

*Is Adolescent Cannabis Use Associated with Increased Brain Activity, Decreased Brain Activity, or Neither?* In terms of directional relationships across the group-comparisons (n=36): twenty-one studies (58%) reported increased BOLD response, six studies (17%) reported decreased BOLD response, four studies (11%) reported both increased and decreased BOLD response (in different regions and/or for different contrasts), and five studies (14%) reported neither increased nor decreased BOLD response (i.e., null finding) between CU and matched non-using TD youth. For studies examining brain-behavior associations between cannabis variables and BOLD response in combined samples (n=9 studies), one study that used an affective Stroop task to assess emotion regulation reported a positive correlation between CUD severity and BOLD response (i.e.  $\uparrow$  CUD severity =  $\uparrow$  brain activity in CU compared to TD youth), five studies (56%) reported a negative correlation between CUD severity and BOLD response (i.e.,  $\uparrow$  CUD severity =  $\downarrow$  brain activity in CU compared to TD youth), and 3 studies (33%) reported no significant relationship between CU frequency or CUD severity and BOLD response. Of note, the cannabis variable used in the primary analyses of all but one these brain-behavior correlation studies was the mean CUDIT score. Focusing on specific domains across all study types: In examining EF/CC results (n=16 studies): seven studies (44%) reported increased BOLD response, three studies (19%) reported decreased BOLD response, three studies (19%) reported both increased and decreased BOLD response in different regions or during different contrasts, and three studies (19%) reported no differences between CU and TD youth. Focusing on EF/CC subdomains: Working Memory (WM) (8 studies): Four WM studies showed increased BOLD response, two WM studies showed decreased BOLD response, and two WM studies reported regions with increased and decreased BOLD response in CU compared to TD youth. Response Inhibition (RI)(4 studies): Two RI studies showed increased BOLD response and

two RI studies showed no difference in BOLD response between CU and TD youth. Conflict Monitoring (CM) (2 studies): One CM study showed increased BOLD response and the other showed decreased BOLD response in CU compared to TD youth. In examining SC/EM results (9 studies): four experiments reported increased BOLD response, four experiments reported decreased BOLD response, and two experiments reported null findings with regard to CU vs. TD differences. Findings with regard to neural response in the SC domain varied by social cues and task type. For example, CU showed increased activation compared to TD youth in the two SC studies using social influence paradigms (Gilman et al., 2016a, 2016b) but showed decreased activation compared to TD youth in a report that used a social exclusion paradigm (Gilman et al., 2016c) and did not differ from TD youth on a retaliation task (Blair et al., 2021). In the EM subdomain, CU status was associated with decreased brain activity during emotional reactivity ( $CU < TD$ ) and increased brain activity during emotion regulation ( $CU > TD$ ). For example, three of four studies measuring neural response during passive viewing of negative affective stimuli (i.e., emotion reactivity) showed decreased BOLD response in CU vs. TD youth. In contrast, two of two studies measuring neural response while youth were attempting to regulate their emotions or behaviors in the presence of negative affective stimuli (i.e., emotion regulation) showed increased BOLD response in CU vs. TD youth. These qualitative results complement our meta-analytic findings for EM. Taken together, they suggest that adolescent cannabis use may result in emotion dysregulation with blunted ‘bottom-up’ emotional reactivity and increased recruitment of compensatory PFC systems required to maintain behavioral control during emotion regulation. In examining REW results ( $n=8$  studies, 9 experimental contrasts): three experiments reported increased BOLD response, four experiments reported no difference in BOLD response, and two experiments reported decreased BOLD response in CU compared to TD youth. However, as noted above the experiments showing decreased BOLD response in CU compared to TD youth should be interpreted cautiously as they reflect reward related differences in BOLD response among CU and TD youth that were only seen when trial accuracy and self-reported novelty were included in the models, with the main reward contrasts for these studies showing no differences between CU and TD youth. Focusing on traditional reward feedback contrasts: three experiments (50%) reported increased BOLD response (2 win vs. neutral and 1 win vs. loss), no experiments (0%) reported decreased BOLD response, and three experiments (50%) reported no difference in BOLD response (1 win vs. neutral and 2 win vs. loss) between CU and TD youth. One whole-brain study examined reward (win vs. neutral) and punishment (loss vs. neutral) feedback separately (Acheson et

al., 2013). The results of this study showed that CU, when compared to TD controls, had increased BOLD response in left lateralized mPFC regions and the left caudate during reward feedback and in right lateralized mPFC regions along with the right ACC, right posterior cingulate, and left insula during punishment feedback. The only whole-brain study to examine reward anticipation showed no CU vs. TD group differences.



**Figure S1.** Meta-regression Results showing an association between BOLD response differences between CU and TD youth and proportion of female participants

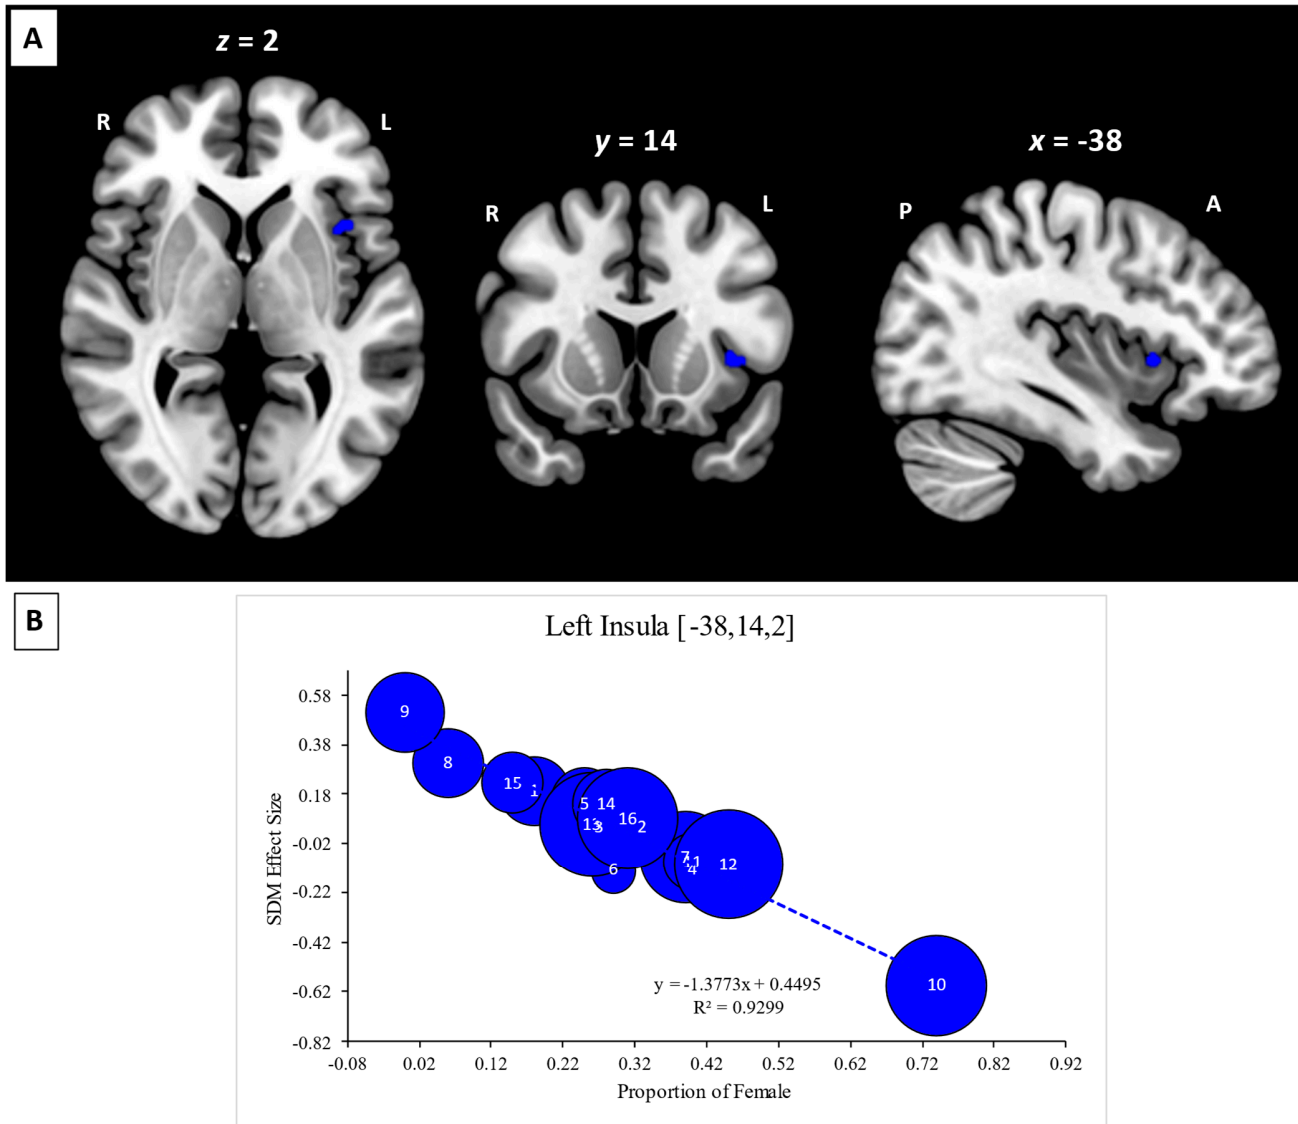

Figure S1. Caption. **(A).** Associations between proportion of female participants in sample and BOLD response differences in the left insula (CU < TD: Insula, 19 voxels, SDM-Z = -2.90) during executive control are shown in blue. All results are thresholded at  $p < 0.005$ . Images visualized using MRICroGL and presented on SDM template. **(B).** A labeled meta-regression plot for the left insula cluster (-38, 14, 2) is presented below the brain images showing a negative correlation between the effect size of BOLD response (SDM-estimate) and proportion of female

participants in each executive control fMRI study. Effect sizes (SDM-estimates) used to create the meta-regression plot were extracted from the peak of maximum slope significance. The meta-regression SDM-estimate value is derived from the proportion of studies that reported BOLD signal changes near the voxel so it is expected that some values are at 0 or near +/- 1. Each included study is represented as a numbered dot, with the dot size reflecting relative total sample size of each specific study in comparison to the average total sample size of all studies included in the regression. Study key: 1 = Padula et al., 2007; 2 = Schweinsburg et al., 2005; 3 = Schweinsburg et al., 2008; 4 = Smith et al., 2010; 5 = Tapert et al., 2007; 6 = Abdullaev et al., 2010; 7 = Cyr et al., 2019; 8 = Behan et al., 2014 ; 9 = Jager et al., 2010; 10 = Kroon et al., 2021; 11 = Hatchard et al., 2014; 12 = Tervo-Clemmens et al., 2018; 13 = Thayer et al., 2015; 14 = Jacobsen et al., 2007; 15 = Schweinsburg et al., 2010; 16 = Schweinsburg et al., 2011. Abbreviations: A= anterior; P= posterior; L= left; R= right; CU= Cannabis Use; TD= Typically Developing

**Table S5.** Results of Jack-knife Reliability Analyses of the Executive Control Meta-analysis

| <b>Studies</b>              | <b>rmPFC<br/>(4, 60, -4)</b>                |
|-----------------------------|---------------------------------------------|
| Padula et al., 2007         | Yes* (2, 58, -6) and (4,54,0) <sup>Δ</sup>  |
| Schweinsburg et al., 2005   | No                                          |
| Schweinsburg et al., 2008   | Yes* (6, 60, -4)                            |
| Schweinsburg et al., 2010   | No <sup>±Δ</sup> (44, -20, 14)              |
| Schweinsburg et al., 2011   | No <sup>±Δ</sup> (44, -20, 14)              |
| Smith et al., 2010          | Yes* (6, 60, -4)                            |
| Tapert et al. 2007          | Yes* (6, 60, -4)                            |
| Jager et al., 2010          | Yes* (6, 60, -4) and (2,52,-2) <sup>Δ</sup> |
| Jacobsen et al., 2007       | No                                          |
| Kroon et al., 2021          | Yes* <sup>Δ</sup> (2, 54, -2) and (0,58,-8) |
| Tervo-Clemmens et al., 2018 | Yes* <sup>Δ</sup> (0, 58, -8)               |
| Cyr et al., 2019            | No                                          |
| Hatchard et al., 2014       | No <sup>±</sup> (52, -16, 44)               |
| Abdullaev et al.            | No                                          |
| Behan et al., 2014          | Yes* <sup>Δ</sup> (6, 60, -4) and (2,52,-2) |
| Thayer et al., 2015         | Yes* (4, 58, -4) and (46,-18,12)            |

**Note:** rmPFC= rostral medial prefrontal cortical cluster that showed increased BOLD response in CU compared to TD youth during tasks of executive function/cognitive control. Yes= denotes that BOLD signal differences between CU vs. TD youth in the rmPFC cluster remained significant following exclusion of this study/dataset as part of the jackknife sensitivity analysis; No= denotes that CU vs. TD BOLD signal differences in the rmPFC cluster were no longer significant when the study/dataset is removed; \* = denotes that the rmPFC activation differences in this region remained significant in meta-analyses when this dataset/study was removed but the peak was located at slightly different coordinates.  $\Delta$  = denotes that the brain region activation difference between CU and TD youth was significant but was small in volume (< 8 voxels).  $\pm$  = denotes studies for which another significant activation foci that differentiated CU and TD youth was identified (in addition to the rmPFC cluster) during reliability testing. Specifically, when the meta-analysis was rerun excluding each of the four studies demarcated with  $\pm$ , a significant activation foci/cluster localized to right supramarginal gyrus (SMG) and primary somatosensory cortex was identified, that showed increased BOLD response in CU compared to TD youth.

**Table S6.** Results of Jack-knife Reliability Analyses of the Social Cognition/Emotion Processing Meta-analysis

| Studies                | dmPFC/dACC<br>(2, 50, 22)   |
|------------------------|-----------------------------|
| Gilman et al., 2016a   | Yes                         |
| Gilman et al., 2016b   | Yes $\pm$ and (42, 10, -14) |
| Gilman et al., 2016c   | Yes $\pm$ and (42, 10, -14) |
| Blair et al., 2021     | Yes* (2, 50, 24)            |
| Heitzeg et al., 2015   | No $\pm$ and (42, 10, -14)  |
| Leiker et al., 2019    | No                          |
| Blair et al., 2019     | Yes* (2, 48, 20)            |
| Aloi et al., 2018      | Yes* (2, 48, 20)            |
| Zimmerman et al., 2017 | Yes $\pm$ and (42, 10, -14) |

**Note:** dmPFC/dACC= cluster combining dorsal medial prefrontal cortex (dmPFC) and dorsal anterior cingulate cortex (dACC) regions that showed increased BOLD response in CU compared to TD youth during social cognition and emotion processing tasks. Yes= denotes that BOLD signal differences between CU vs. TD youth for this brain region (dmPFC) remain significant following exclusion of this study/dataset as part of the jackknife sensitivity analysis; No= denotes that CU vs. TD BOLD signal differences for this brain region were no longer significant when the study/dataset is removed; \* = denotes that the brain region activation difference finding remained significant in meta-analyses when this dataset/study was removed but the peak of the foci was located at slightly different coordinates.  $\pm$  = denotes studies for which another significant activation foci was identified (in addition to the dmPFC/dACC cluster) during reliability testing. Specifically, jackknife analysis excluding these four studies showed activation differences in a small cluster (<10 voxels) localized to the right insula (42, 10, -14) that showed decreased BOLD response in CU compared to TD youth.

**Figure S2.** Funnel Plots for Primary Meta-analysis Related to Executive Function/Cognitive Control (A) and Social Cognition Emotion Processing (B) Domains.

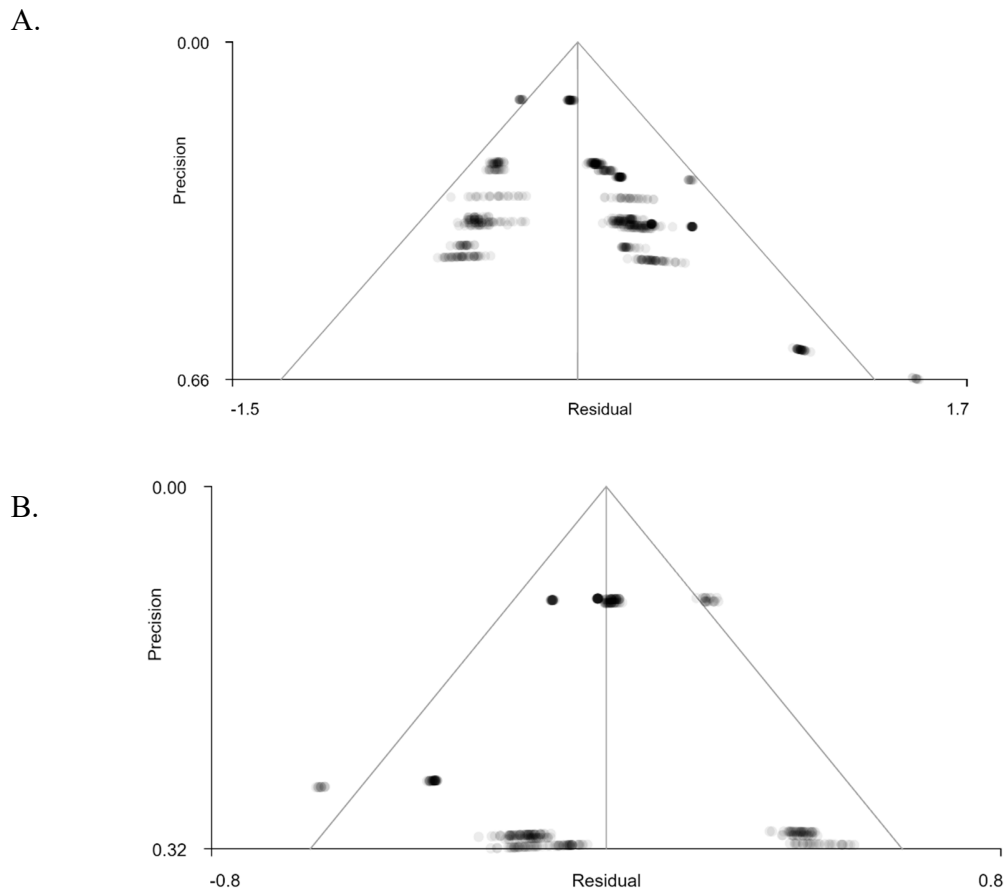

Figure S2. Caption: Funnel Plots for Primary Meta-analysis of Executive Function/Cognitive Control Domain (A) and Social Cognition/Emotion Processing Domain (B). Funnel plots were created using SDM software and plotted the effect estimate (standardized BOLD signal difference between CU and TD participants) on the X-axis and the variance on the Y-axis for each study included in the primary meta-analyses focused on EF/CC and SC/EM domains. Results of these funnel plots show symmetric distribution of studies suggesting low evidence for bias in our two primary meta-analytic results. Using SDM's Metabias calculation tool, the Risk of Bias for the EF/CC domain meta-analysis is: Bias Test = 0.86,  $z$ : 1.03,  $df$ : 14,  $p=0.301$  and the Risk of Bias for the SC/EM domain meta-analysis is: Bias Test = -0.19,  $z$ : -0.20,  $df$ : 7,  $p=0.838$ .

**Table S7. Abstinence-based subgroup Meta-analyses of fMRI studies comparing CU and TD youth**

| Cluster #, Label                             | BA         | Voxels | MNI coordinates |     |     | SDM-Z | P-value      |
|----------------------------------------------|------------|--------|-----------------|-----|-----|-------|--------------|
|                                              |            |        | x               | y   | z   |       |              |
| Ad-lib use to $\geq$ 12-hours abstinent      |            |        |                 |     |     |       |              |
| <u>CU &gt; TD youth</u>                      |            |        |                 |     |     |       |              |
| Right caudate                                | 25         | 120    | 16              | 16  | 4   | 3.30  | $p=0.0005$   |
| Right thalamus                               |            |        |                 |     |     |       |              |
| Right anterior thalamic projections          |            |        |                 |     |     |       |              |
| Corpus callosum                              |            |        |                 |     |     |       |              |
|                                              |            |        | 16              | 16  | 4   |       |              |
|                                              |            |        | 10              | 14  | 2   |       |              |
|                                              |            |        | 8               | 6   | 2   |       |              |
|                                              |            |        | 0               | 2   | 2   |       |              |
| <u>CU &lt; TD youth</u>                      |            |        |                 |     |     |       |              |
| None                                         |            |        |                 |     |     |       |              |
| $\geq$ 24-hours abstinent                    |            |        |                 |     |     |       |              |
| <u>CU &gt; TD youth</u>                      |            |        |                 |     |     |       |              |
| Right insula                                 | 47, 38     | 74     | 42              | 18  | -6  | 3.02  | $p=0.0013$   |
| Right IFG, orbital part                      |            |        |                 |     |     |       |              |
|                                              |            |        | 42              | 18  | -10 |       |              |
|                                              |            |        | 46              | 18  | -10 |       |              |
| <u>CU &lt; TD youth</u>                      |            |        |                 |     |     |       |              |
| None                                         |            |        |                 |     |     |       |              |
| $\geq$ 48-hours to $\geq$ 72-hours abstinent |            |        |                 |     |     |       |              |
| <u>CU &gt; TD youth</u>                      |            |        |                 |     |     |       |              |
| Right insula                                 | 48, 47, 45 | 29     | 36              | 28  | 6   | 3.23  | $p=0.0006$   |
| Right IFG, triangular part                   |            |        |                 |     |     |       |              |
|                                              |            |        | 40              | 32  | 2   |       |              |
| <u>CU &lt; TD youth</u>                      |            |        |                 |     |     |       |              |
| None                                         |            |        |                 |     |     |       |              |
| $\geq$ 21 days abstinent                     |            |        |                 |     |     |       |              |
| <u>CU &gt; TD youth</u>                      |            |        |                 |     |     |       |              |
| None                                         |            |        |                 |     |     |       |              |
| <u>CU &lt; TD youth</u>                      |            |        |                 |     |     |       |              |
| Cluster #1                                   | 10, 32, 9  | 437    | 4               | 52  | 28  | -4.70 | $p=0.000001$ |
| Right dmPFC                                  |            |        |                 |     |     |       |              |
| Left dmPFC                                   |            |        |                 |     |     |       |              |
| Right dACC                                   |            |        |                 |     |     |       |              |
| Left dACC                                    |            |        |                 |     |     |       |              |
|                                              |            |        | -4              | 50  | 28  |       |              |
| Cluster #2                                   | 3, 4       | 26     | 48              | -14 | 44  | -3.23 | $p=0.0006$   |
| Right precentral gyrus                       |            |        |                 |     |     |       |              |
| Right postcentral gyrus                      |            |        |                 |     |     |       |              |
|                                              |            |        | 52              | -16 | 40  |       |              |

**NOTE:** SDM meta-analyses were carried out in SDM-PSI.v.6.21 on subgroups of fMRI studies comparing CU and TD youth stratified based upon the length of abstinence required at the time of the scan (Ad-lib cannabis use to  $\geq 12$ -hours abstinent CU subgroup [10 studies],  $\geq 24$ -hours abstinent CU subgroup [11 studies],  $\geq 48$ -hours to  $\geq 72$ -hours abstinent CU subgroup [7 studies], and  $\geq 21$  days of abstinence or longer CU subgroup [15 studies]). Statistical analysis threshold set at P-value  $< 0.005$ . Coordinates shown are MNI. **Abbreviations:** BA= Broadman's area; dmPFC= dorsal medial prefrontal cortex; dACC= dorsal Anterior cingulate cortex; IFG= inferior frontal gyrus; CU= cannabis using youth; TD= typically developing control youth

**Figure S3.** Meta-analysis Results showing BOLD response differences in CU compared to TD youth for different abstinence subgroups.

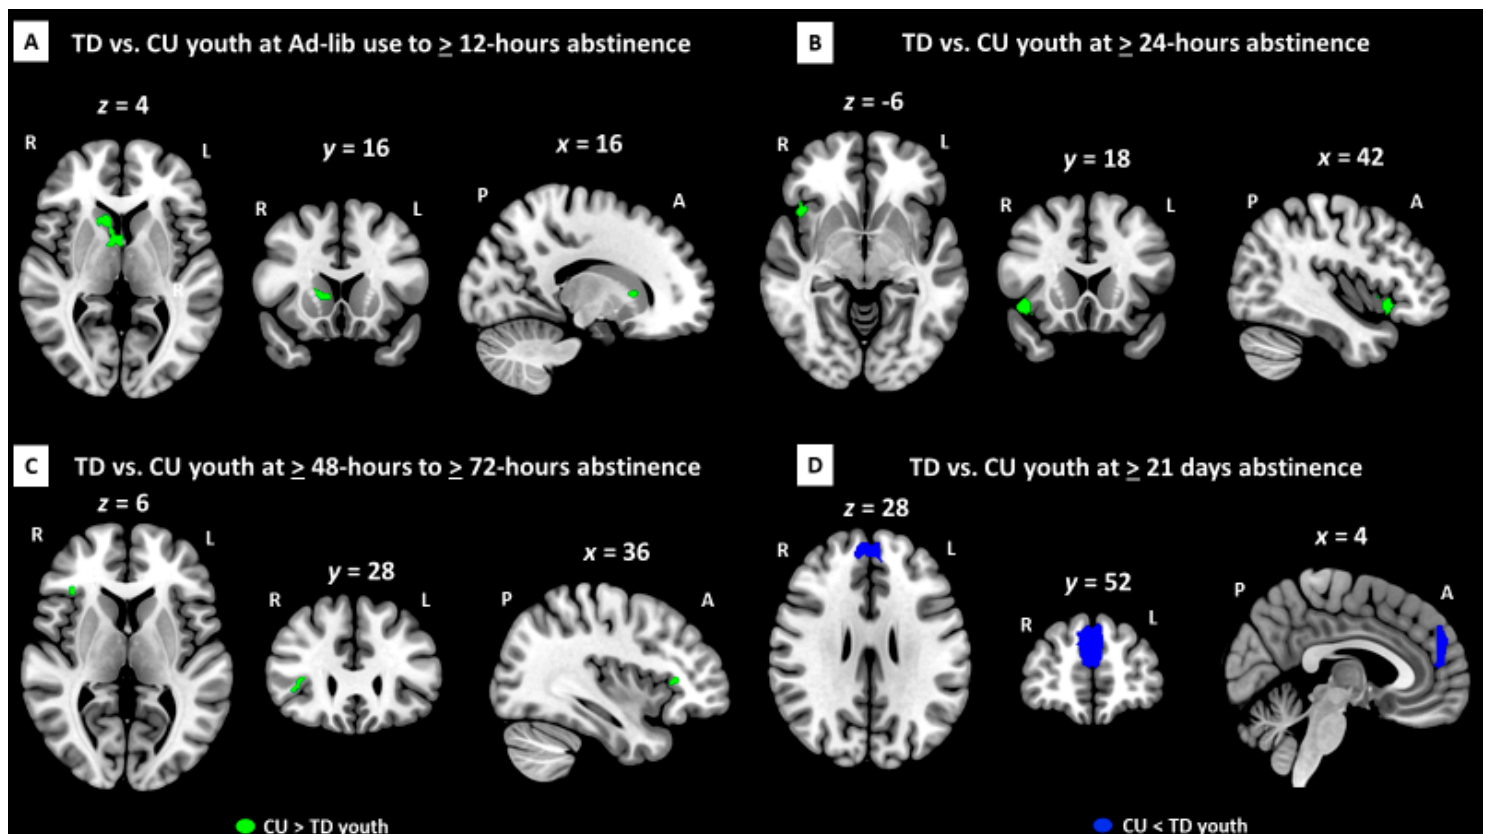

Figure S3. Caption: **(A)** Meta-analytic Result comparing TD youth to CU youth at Ad-lib use to  $> 12$ -hours abstinence. At ad-lib use to 12-hour abstinence, an increase in activation in CU youth compared to TD youth can be seen in green in the right caudate extending to the anterior thalamic projections, thalamus, and corpus callosum (peak cluster of 120 voxels; MNI coordinates:  $x=16$ ,  $y=16$ ,  $z=4$ ). **(B)** Meta-analytic Result comparing TD youth to

CU youth at > 24-hours abstinence. At 24-hours abstinence, an increase in activation in CU youth compared to TD youth can be seen in green in the right insula extending anteriorly into the right IFG (peak cluster of 74 voxels; MNI coordinates: x=42, y=18, z=-6). **(C)** Meta-analytic Result comparing TD youth to CU youth at > 48-hours to > 72-hours abstinence. Similar to at 24-hours, at 48-to-72-hours abstinence, an increase in activation in CU youth compared to TD youth can be seen in green in the right insula extending anteriorly into the right IFG (peak cluster of 29 voxels; MNI coordinates: x=36, y=28, z=6). **(D)** Meta-analytic Results comparing TD youth to CU youth at > 21-days abstinence. At 21 days or longer abstinence, a decrease in activation in CU compared to TD youth can be seen in blue in a large bilateral cluster localized to the right/left dorsal mPFC and right/left dorsal ACC (peak cluster of 437 voxels; MNI coordinates: x=4, y=52, z=28). Activation differences in a small cluster localized to the right precentral and postcentral gyri (peak cluster of 26 voxels; MNI coordinates: x=48, y=-14, z=44) were also found in CU at  $\geq 21$ -days abstinence but are not visible on these images. All results are thresholded at  $p < 0.005$  (cluster size  $> 10$  voxels). Green is used to identify activation foci where CU  $>$  TD youth. Blue is used to identify activation foci where CU  $<$  TD youth. Images visualized using MRICroGL and presented on SDM template. Abbreviations: BOLD = blood-oxygen-level-dependent; CU = cannabis using; TD = typically developing; MNI = Montreal Neurologic Institute coordinates; mPFC = medial prefrontal cortex; ACC= anterior cingulate cortex; IFG = inferior frontal gyrus.

**Figure S4.** Meta-analysis Results showing BOLD response differences between adolescents with cannabis use disorders and matched non-using typically developing adolescent controls.

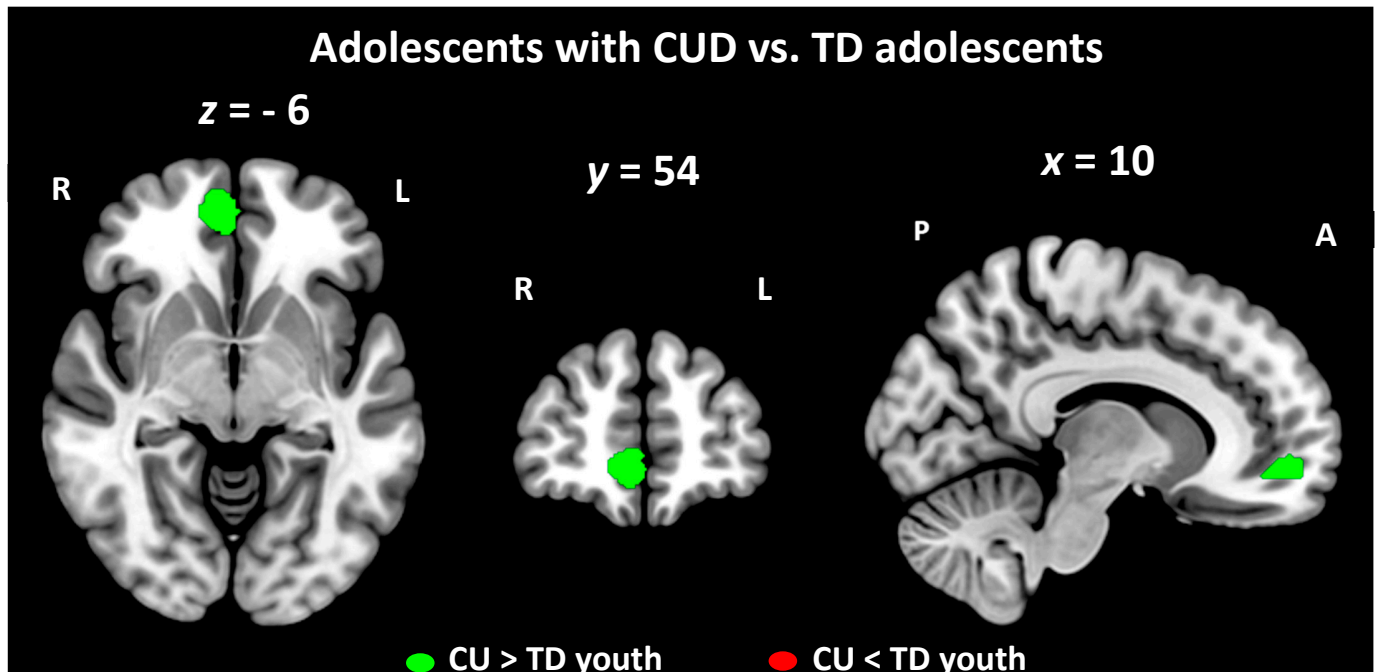

Figure S4. Caption: Subgroup Meta-analysis results comparing adolescents with CUD to TD adolescents across all domains/paradigms. An increase in activation in adolescents with CUD versus TD adolescents across all domains/paradigms in the rostral, ventral, and dorsal mPFC extending to the dACC centered in the right rmPFC (peak cluster of 258 voxels; MNI coordinates:  $x=2$ ,  $y=50$ ,  $z=-4$ ) is shown in green. A second cluster showing the increase in brain activation in the inferior parietal lobule (IPL) in adolescents with CUD compared to TD youth was also found but is not visualized in this figure. All results are thresholded at  $p < 0.005$ . Images visualized using MRICroGL and presented on SDM template. Abbreviations: BOLD = blood-oxygen-level-dependent; CU = cannabis using; CUD= cannabis use disorder; dACC= dorsal anterior cingulate cortex; TD = typically developing; MNI = Montreal Neurologic Institute coordinates; mPFC = medial prefrontal cortex; rmPFC= rostral mPFC; R= right; L= left; A= anterior; P= posterior
